# Supplementary material
Source: HighWire-hosted journal article supplement (https://heart.bmj.com/content/107/23/1889)

Supplemental figure 5: Sustained ventricular arrhythmias, competing risk= death (not included in the definition of SVA)

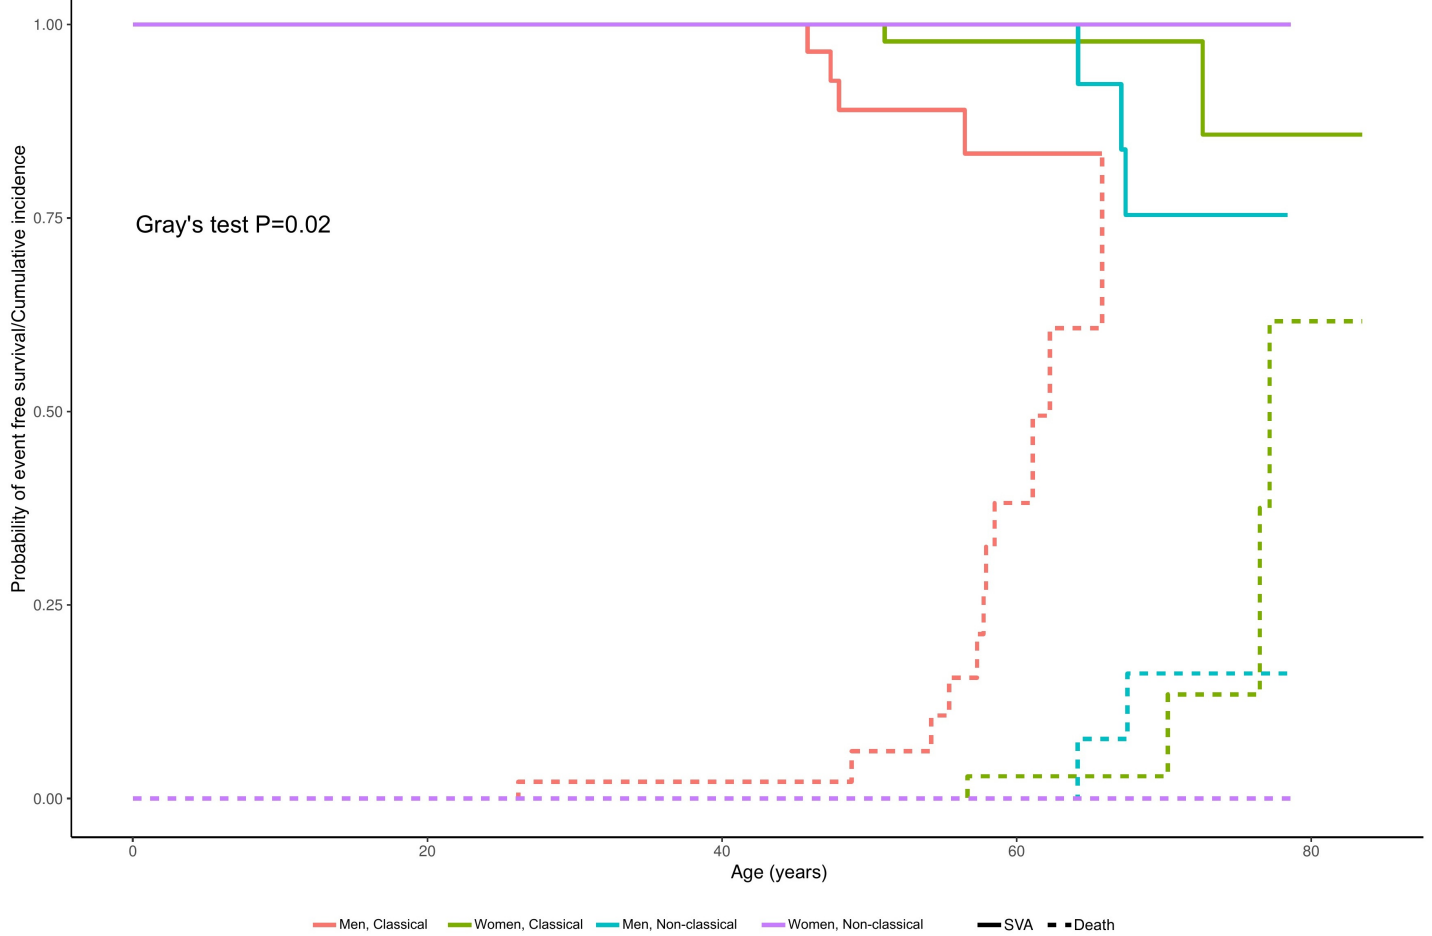

Supplement: inline-supplementary-material-6 [file inline-supplementary-material-6.pdf]
