# Supplementary material
Source: HighWire-hosted journal article supplement (https://heart.bmj.com/content/107/23/1889)

Supplemental figure 2: Major adverse cardiovascular events, competing risk= non-CVD

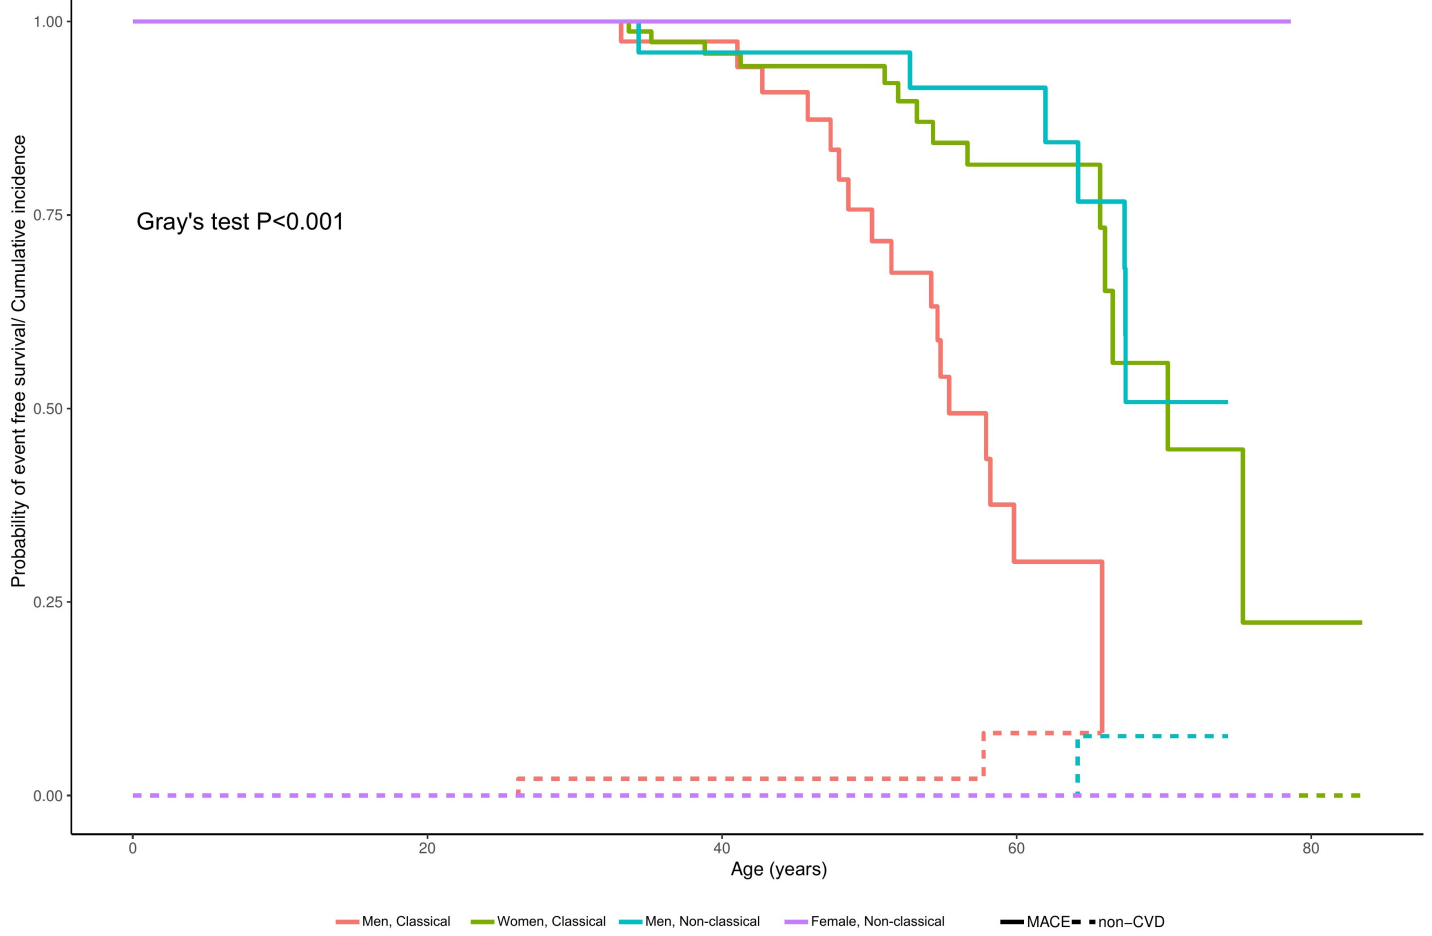

Supplement: inline-supplementary-material-3 [file inline-supplementary-material-3.pdf]

Supplemental figure 3: Cardiovascular death, competing risk= non-CVD

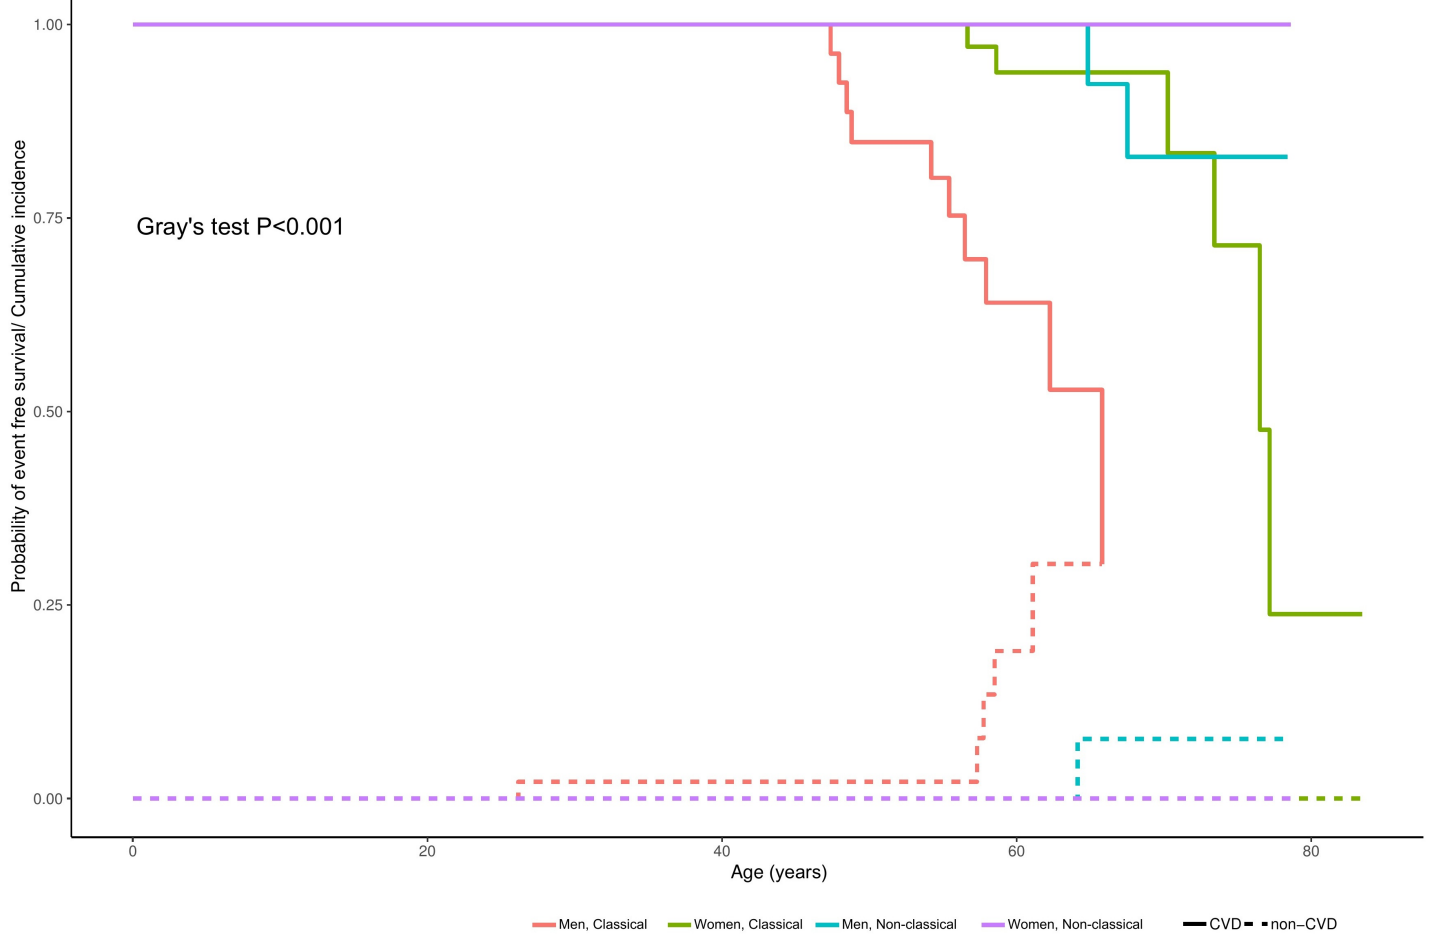

Supplement: inline-supplementary-material-4 [file inline-supplementary-material-4.pdf]

Supplemental figure 4: Heart failure hospitalization, competing risk= non-CVD

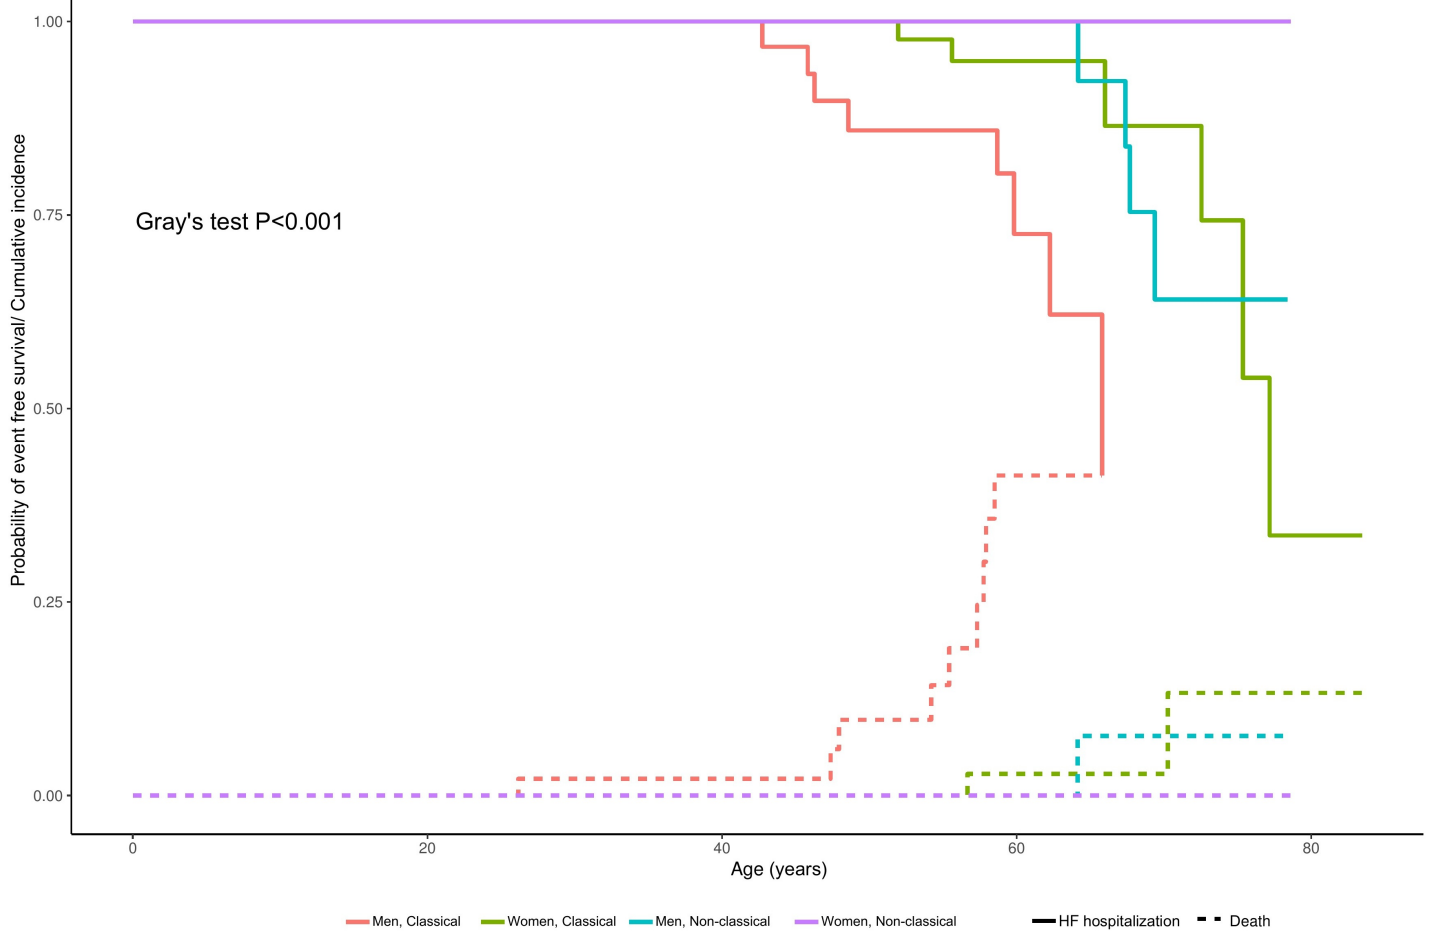

Supplement: inline-supplementary-material-5 [file inline-supplementary-material-5.pdf]

Supplemental figure 6: Myocardial infarction, competing risk= death

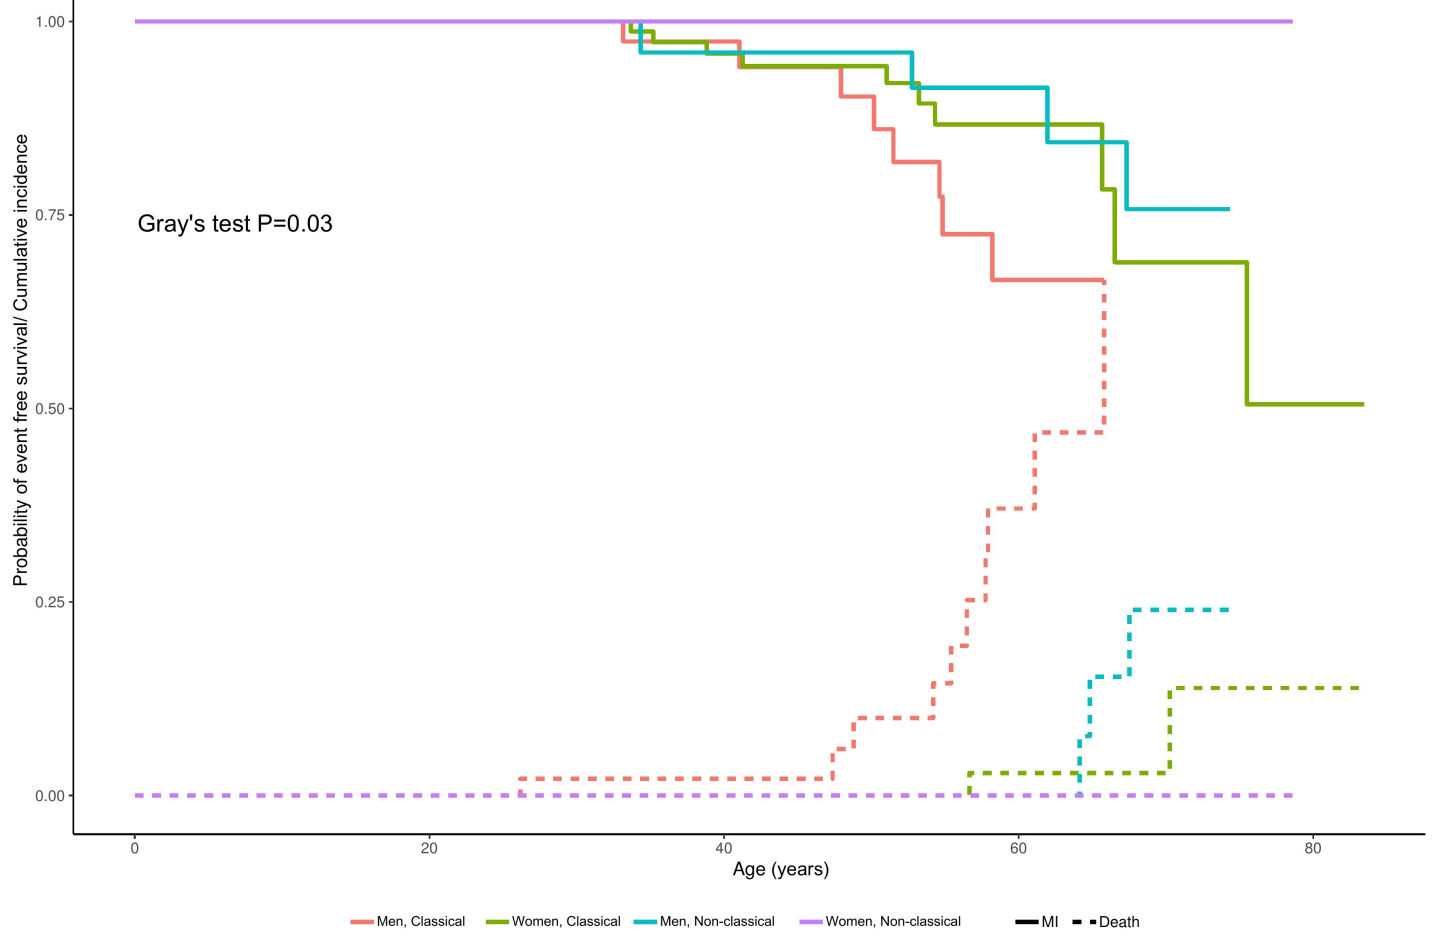

Supplement: inline-supplementary-material-7 [file inline-supplementary-material-7.pdf]
